# Supplementary material
Source: publisher figshare collection journal article supplement (https://tandf.figshare.com/ndownloader/files/22851029)
Supplement: Supplementary file 1 [file 22851029]

## Sheet: traits
Species	annual	biennal	perennial	spinescense	lifeform	N_fixation	resin (0/1)	latex (0/1)	storage organ (rhizome, bulb etc.)	taproot	plant_height_(cm)	Flowering (3-4)	Flowering (5-6)	Flowering (7-8)	Flowering (9-10)	leafcomposition	leaftype	phyllotaxy	pubescence	pollination	seed_dispersion	fleshy fruit (0/1)	Asteraceae	Rosaceae	Brassicaceae	Lamiaceae	Caryophyllaceae	Fabaceae	Cyperaceae	Poaceae	Orchidaceae	Oleaceae	Plantaginaceae	Pinaceae	Others	ruderal_plant	Light	Temperature	Continent	Humidity	Acidity	Nutrients	leaf_phenology	Salt tolerance	Distributional range
Acer_campestre	0	0	1	0	tree	0	0	0	0	0	500	0.5	0.5	0	0	Simple	leaf	alternate	1	biotic	wind	0	0	0	0	0	0	0	0	0	0	0	0	0	1	0	5	7	4	5	7	6	s	1	wide
Achillea_millefolium_aggr	0	0	1	0	forb	0	0	0	1	0	60	0	0.5	0.5	0	pinnately	scleromorphic	alternate	1	biotic	wind	0	1	0	0	0	0	0	0	0	0	0	0	0	0	1	8			4		5	s	1	wide
Aegonychon_purpurocaeruleum	0	0	1	0	forb	0	0	0	1	0	50	0.5	0.5	0	0	Simple	leaf	alternate	1	biotic	non-specialized	0	0	0	0	0	0	0	0	0	0	0	0	0	1	0	5	7	6	4	8	4	w	0	wide
Agrimonia_eupatoria	0	0	1	0	forb	0	0	0	1	0	60	0	0.5	0.5	0	pinnately	leaf	alternate	1	biotic	adhesive	0	0	1	0	0	0	0	0	0	0	0	0	0	0	0	7	6	5	4	8	4	s	0	wide
Ailanthus_altissima	0	0	1	0	tree	0	0	0	0	0	1500	0	1	0	0	pinnately	leaf	alternate	1	biotic	wind	0	0	0	0	0	0	0	0	0	0	0	0	0	1	0	6	7	5	5	5	5	s	1	neo
Ajuga_chamaepitys	0.5	0.5	0	0	forb	0	0	0	0	0	20	0.25	0.25	0.25	0.25	Simple	leaf	opposite	2	biotic	non-specialized	0	0	0	0	1	0	0	0	0	0	0	0	0	0	0	7	8	5	4	9	2	w	0	mediterranean
Ajuga_reptans	0	0	1	0	forb	0	0	0	1	0	15	0.5	0.5	0	0	Simple	leaf	opposite	1	biotic	non-specialized	0	0	0	0	1	0	0	0	0	0	0	0	0	0	0	6		4	6		6	w	0	wide
Alliaria_petiolata	0	0.5	0.5	0	forb	0	0	0	0	1	80	0	0.5	0.5	0	Simple	leaf	alternate	1	biotic	non-specialized	0	0	0	1	0	0	0	0	0	0	0	0	0	0	1	5	6	5	5	7	9	s	0	wide
Alnus_glutinosa	0	0	1	0	tree	1	0	0	0	0	2000	1	0	0	0	Simple	leaf	alternate	1	abiotic	non-specialized	0	0	0	0	0	0	0	0	0	0	0	0	0	1	0	5	5	5	9	6	8	s	1	wide
Anacamptis_coriophora	0	0	1	0	forb	0	0	0	1	0	30	0.5	0.5	0	0	Simple	leaf	alternate	1	biotic	wind	0	0	0	0	0	0	0	0	0	1	0	0	0	0	0	7	8	5	3	5	3	w	0	submediterranean
Anacamptis_morio	0	0	1	0	forb	0	0	0	1	0	40	0.5	0.5	0	0	Simple	leaf	alternate	1	biotic	wind	0	0	0	0	0	0	0	0	0	1	0	0	0	0	0	7	5	4	4	7	3	s	0	wide
Anacamptis_pyramidalis	0	0	1	0	forb	0	0	0	1	0	50	0	1	0	0	Simple	leaf	basal	1	biotic	wind	0	0	0	0	0	0	0	0	0	1	0	0	0	0	0	8	7	5	3	9	2	s	0	submediterranean
Anisantha_sterilis	1	0	0	0	graminoid	0	0	0	0	0	40	0.5	0.5	0	0	Simple	scleromorphic	alternate	1	abiotic	wind	0	0	0	0	0	0	0	0	1	0	0	0	0	0	1	7	7	5	4		5	s	0	submediterranean
Anthemis_arvensis	1	0	0	0	forb	0	0	0	0	0	50	0.5	0.5	0	0	pinnately	leaf	alternate	1	biotic	wind	0	1	0	0	0	0	0	0	0	0	0	0	0	0	1	7	6	4	4	3	6	w	0	wide
Anthoxanthum_odoratum	0	0	1	0	graminoid	0	0	0	0	0	60	0.333333	0.333333	0.333333	0	Simple	leaf	alternate	1	abiotic	adhesive	0	0	0	0	0	0	0	0	1	0	0	0	0	0	0			5		5	3	s	1	wide
Aphanes_arvensis	1	0	0	0	forb	0	0	0	0	0	30	0	0.333333	0.333333	0.333333	Simple	leaf	alternate	2	biotic	non-specialized	0	0	1	0	0	0	0	0	0	0	0	0	0	0	0	6	5	5	6	4	5	w	0	wide
Arabidopsis_thaliana	0.5	0.5	0	0	forb	0	0	0	0	0	15	1	0	0	0	Simple	leaf	alternate	1	biotic	adhesive	0	0	0	1	0	0	0	0	0	0	0	0	0	0	1	6		5	4	5	4	w	0	wide
Arabis_sagittata	0	0	1	0	forb	0	0	0	0	0	60	0	0.5	0.5	0	Simple	leaf	alternate	1	biotic	wind	0	0	0	1	0	0	0	0	0	0	0	0	0	0	0	7	6	6	4	8	3	s	0	wide
Arenaria_serpyllifolia	0.5	0.5	0	0	forb	0	0	0	0	0	15	0.25	0.25	0.25	0.25	Simple	leaf	opposite	1	biotic	adhesive	0	0	0	0	0	1	0	0	0	0	0	0	0	0	1	9	5		4			w	0	wide
Aristolochia_clematitis	0	0	1	0	forb	0	0	0	1	0	100	0.5	0.5	0	0	Simple	leaf	alternate	1	biotic	wind	0	0	0	0	0	0	0	0	0	0	0	0	0	1	0	6	7	5	4	8	8	s	0	mediterranean
Aristolochia_rotunda	0	0	1	0	forb	0	0	0	1	0	40	0.5	0.5	0	0	Simple	leaf	alternate	1	biotic	non-specialized		0	0	0	0	0	0	0	0	0	0	0	0	1	0	6	7	5	4	6	3	s	0	mediterranean
Arum_italicum	0	0	1	0	forb	0	0	0	1	0	40	0.5	0.5	0	0	Simple	leaf	basal	1	biotic	myrmecochory	1	0	0	0	0	0	0	0	0	0	0	0	0	1	0	6	8	4	4	5	5	s	0	submediterranean
Asparagus_acutifolius	0	0	1	1	vine	0	0	0	1	0	150	0	0	0.5	0.5	Simple	needle	whorled	1	biotic	ingested	1	0	0	0	0	0	0	0	0	0	0	0	0	1	0	6	9	4	2	5	5	i	0	mediterranean
Asparagus_officinalis	0	0	1	0	forb	0	0	0	1	0	150	0	1	0	0	Simple	needle	whorled	1	biotic	ingested	1	0	0	0	0	0	0	0	0	0	0	0	0	1	0	8	8	5	5	5	5	s	0	mediterranean
Asperula_laevigata	0	0	1	0	forb	0	0	0	0	0	80	0	0	0.5	0.5	Simple	leaf	whorled	1	biotic	non-specialized	0	0	0	0	0	0	0	0	0	0	0	0	0	1	0	6	6	4	4	7	3	s	0	mediterranean
Avena_fatua	1	0	0	0	graminoid	0	0	0	0	0	100	0.5	0.5	0	0	Simple	leaf	alternate	1	abiotic	wind	0	0	0	0	0	0	0	0	1	0	0	0	0	0	1	6		6	6	7		v	0	wide
Ballota_nigra	0	0	1	0	forb	0	0	0	1	0	60	0	0.5	0.5	0	Simple	leaf	opposite	1	biotic	myrmecochory	0	0	0	0	1	0	0	0	0	0	0	0	0	0	1	8	6	5	5		8	w	0	mediterranean
Bellis_perennis	0	0	1	0	forb	0	0	0	1	0	15	0.25	0.25	0.25	0.25	Simple	leaf	basal	1	biotic	wind	0	1	0	0	0	0	0	0	0	0	0	0	0	0	1	9	5	4			5	w	0	wide
Berberis_vulgaris	0	0	1	1	shrub	0	0	0	0	0	200	0	1	0	0	Simple	leaf	alternate	1	biotic	ingested	1	0	0	0	0	0	0	0	0	0	0	0	0	1	1	6	6	5	4	8	3	s	0	wide
Brachypodium_phoenicoides	0	0	1	0	graminoid	0	0	0	1	0	60	0	0.5	0.5	0	Simple	scleromorphic	alternate	1	abiotic	wind	0	0	0	0	0	0	0	0	1	0	0	0	0	0	0	6	5	5	4	7	4	s	0	mediterranean
Brachypodium_sylvaticum	0	0	1	0	graminoid	0	0	0	0	0	50	0	0.5	0.5	0	Simple	scleromorphic	alternate	1	abiotic	wind	0	0	0	0	0	0	0	0	1	0	0	0	0	0	0	4	5	5	5	6	6	s	0	wide
Bromus_erecta	0	0	1	0	graminoid	0	0	0	0	0	60	0	0.5	0.5	0	Simple	scleromorphic	alternate	1	abiotic	wind	0	0	0	0	0	0	0	0	1	0	0	0	0	0	0	8	5	7	3	8	3	s	0	wide
Calystegia_sepium	0	0	1	0	vine	0	0	0	1	0	120	0	0.333333	0.333333	0.333333	Simple	leaf	alternate	1	biotic	wind	0	0	0	0	0	0	0	0	0	0	0	0	0	1	1	8	6	5	6	7	9	s	0	wide
Campanula_rapunculus	0	1	0	0	forb	0	0	0	0	1	100	0	0.333333	0.333333	0.333333	Simple	leaf	alternate	2	biotic	wind	0	0	0	0	0	0	0	0	0	0	0	0	0	1	0	7	7	5	4	6	4	s	0	wide
Cardamine_hirsuta	0.5	0.5	0	0	forb	0	0	0	0	0	25	1	0	0	0	pinnately	leaf	alternate	1	biotic	ballistic	0	0	0	1	0	0	0	0	0	0	0	0	0	0	1	7	8	5	3	5	4	w	0	wide
Carduus_pycnocephalus	0	1	0	1	forb	0	0	0	0	1	60	0.333333	0.333333	0.333333	0	Simple	leaf	basal	1	biotic	wind	0	1	0	0	0	0	0	0	0	0	0	0	0	0	1	7	8	4	3		3	s	0	mediterranean
Carex_acuta	0	0	1	0	graminoid	0	0	0	1	0	150	0.5	0.5	0	0	Simple	scleromorphic	alternate	1	abiotic	wind	0	0	0	0	0	0	0	1	0	0	0	0	0	0	0	7	4	7	9	6	4	s	0	wide
Carex_acutiformis	0	0	1	0	graminoid	0	0	0	1	0	100	0.5	0.5	0	0	Simple	leaf	alternate	1	abiotic	wind	0	0	0	0	0	0	0	1	0	0	0	0	0	0	0	7	5	5	9	7	5	s	0	wide
Carex_distans	0	0	1	0	graminoid	0	0	0	0	0	80	0.5	0.5	0	0	Simple	leaf	alternate	1	abiotic	wind	0	0	0	0	0	0	0	1	0	0	0	0	0	0	0	9	6	5	7	8		w	1	wide
Carex_flacca	0	0	1	0	graminoid	0	0	0	1	0	50	0.5	0.5	0	0	Simple	leaf	alternate	1	abiotic	wind	0	0	0	0	0	0	0	1	0	0	0	0	0	0	0	7	5	5	6	8		s	1	wide
Carex_liparocarpos	0	0	1	0	graminoid	0	0	0	1	0	30	0.5	0.5	0	0	Simple	leaf	alternate	1	abiotic	wind	0	0	0	0	0	0	0	1	0	0	0	0	0	0	0	8	7	6	2	6	2	s	0	wide
Carpinus_betulus	0	0	1	0	tree	0	0	0	0	0	1500	0	1	0	0	Simple	leaf	alternate	1	abiotic	wind	0	0	0	0	0	0	0	0	0	0	0	0	0	1	0	4	6	4				s	0	wide
Celtis_australis	0	0	1	0	tree	0	0	0	0	0	1000	0.5	0.5	0	0	Simple	leaf	alternate	1	biotic	ingested	1	0	0	0	0	0	0	0	0	0	0	0	0	1	0	7	8	5	3	7	4	s	1	mediterranean
Centaurea_nigrescens	0	0	1	0	forb	0	0	0	0	0	100	0	0.5	0.5	0	Simple	leaf	alternate	1	biotic	wind	0	1	0	0	0	0	0	0	0	0	0	0	0	0	0	7	6	5	4	5	4	s	0	wide
Centaurium_erythraea	0	1	0	0	forb	0	0	0	0	0	50	0	0.333333	0.333333	0.333333	Simple	leaf	basal	1	biotic	wind	0	0	0	0	0	0	0	0	0	0	0	0	0	1	0	8	6	5	5	6		s	0	wide
Cerastium_brachypetalum	1	0	0	0	forb	0	0	0	0	0	30	0.25	0.25	0.25	0.25	Simple	leaf	opposite	2	biotic	wind	0	0	0	0	0	1	0	0	0	0	0	0	0	0	1	10	7	5	3	7	2	w	0	wide
Cerastium_fontanum	0	0	1	0	forb	0	0	0	0	0	20	0.5	0.5	0	0	Simple	leaf	opposite	1	biotic	wind	0	0	0	0	0	1	0	0	0	0	0	0	0	0	1	6			5		5	w	1	wide
Cerastium_glomeratum	1	0	0	0	forb	0	0	0	0	0	30	0.25	0.25	0.25	0.25	Simple	leaf	opposite	2	biotic	wind	0	0	0	0	0	1	0	0	0	0	0	0	0	0	1	7		5	5	5	5	w	0	submediterranean (??)
Cerastium_semidecandrum	0.5	0.5	0	0	forb	0	0	0	0	0	20	1	0	0	0	Simple	scleromorphic	opposite	1	biotic	wind	0	0	0	0	0	1	0	0	0	0	0	0	0	0	1	8	7	5	4			s	0	wide
Chaerophyllum_temulum	0.5	0.5	0	0	forb	0	0	0	1	0	140	0	0.5	0.5	0	palmately	leaf	alternate	1	biotic	ballistic	0	0	0	0	0	0	0	0	0	0	0	0	0	1	0	5	6	5	5		8	s	0	wide
Cichorium_intybus	0	0	1	0	forb	0	0	1	0	1	120	0	0	0.5	0.5	Simple	scleromorphic	alternate	1	biotic	wind	0	1	0	0	0	0	0	0	0	0	0	0	0	0	1	9	6	5	3	8	5	s	0	wide
Cirsium_arvense	0	0	1	1	forb	0	0	0	1	0	150	0	0.333333	0.333333	0.333333	Simple	scleromorphic	alternate	1	biotic	wind	0	1	0	0	0	0	0	0	0	0	0	0	0	0	1	8			4		7	s	1	wide
Clematis_flammula	0	0	1	0	vine	0	0	0	0	0	500	0	0.5	0.5	0	palmately	leaf	alternate	1	biotic	wind	0	0	0	0	0	0	0	0	0	0	0	0	0	1	0	7	9	5	3	5	4	s	0	mediterranean
Clinopodium_vulgare	0	0	1	0	forb	0	0	0	0	0	60	0	0.5	0.5	0	Simple	leaf	opposite	1	biotic	wind	0	0	0	0	1	0	0	0	0	0	0	0	0	0	1	7	5	4	4	7	3	s	0	wide
Convolvulus_arvensis	0	0	1	0	vine	0	0	0	1	0	50	0.25	0.25	0.25	0.25	Simple	leaf	opposite	1	biotic	non-specialized	0	0	0	0	0	0	0	0	0	0	0	0	0	1	1	7	7	5	4	5	5	s	0	wide
Cornus_mas	0	0	1	0	shrub	0	0	0	0	0	500	1	0	0	0	Simple	leaf	opposite	1	biotic	ingested	1	0	0	0	0	0	0	0	0	0	0	0	0	1	0	6	7	6	5	8	4	s	0	wide
Cornus_sanguinea	0	0	1	0	shrub	0	0	0	0	0	400	0	1	0	0	Simple	leaf	opposite	1	biotic	ingested	1	0	0	0	0	0	0	0	0	0	0	0	0	1	0	7	5	5	7	8		s	0	wide
Cotinus_coggygria	0	0	1	0	shrub	0	0	1	0	0	500	0.333333	0.333333	0.333333	0	Simple	leaf	alternate	1	biotic	wind	0	0	0	0	0	0	0	0	0	0	0	0	0	1	0	7	6	7	3	7	2	s	0	mediterranean
Crataegus_monogyna	0	0	1	1	shrub	0	0	0	0	0	500	0.5	0.5	0	0	Simple	leaf	alternate	1	biotic	ingested	1	0	1	0	0	0	0	0	0	0	0	0	0	0	0	6	7	5	4	6	3	s	0	wide
Crepis_capillaris	0.5	0.5	0	0	forb	0	0	1	0	1	100	0	1	0	0	Simple	leaf	basal	1	biotic	wind	0	1	0	0	0	0	0	0	0	0	0	0	0	0	1	7	6	5	4	5	3	s	0	wide
Crepis_foetida	0.5	0.5	0	0	forb	0	0	1	0	1	40	0	0.333333	0.333333	0.333333	Simple	leaf	basal	2	biotic	wind	0	1	0	0	0	0	0	0	0	0	0	0	0	0	1	11	9	5	2		2	s	0	submediterranean
Cynoglossum_officinale	0	1	0	0	forb	0	0	0	0	1	80	0.5	0.5	0	0	Simple	leaf	alternate	2	biotic	adhesive	0	0	0	0	0	0	0	0	0	0	0	0	0	1	1	8	5	5	3	7	8	s	0	wide
Dactylis_glomerata	0	0	1	0	graminoid	0	0	0	0	0	120	0	0.5	0.5	0	Simple	leaf	alternate	1	abiotic	adhesive	0	0	0	0	0	0	0	0	1	0	0	0	0	0	1	7	6	5	4	5	6	s	0	wide
Daucus_carota	0	1	0	0	forb	0	0	0	1	0	60	0.25	0.25	0.25	0.25	pinnately	leaf	alternate	1	biotic	adhesive	0	0	0	0	0	0	0	0	0	0	0	0	0	1	1	8	6	5	4	5	4	s	0	wide
Dioscorea_communis	0	0	1	0	vine	0	0	0	1	0	400	0	1	0	0	Simple	leaf	alternate	1	biotic	ingested	1	0	0	0	0	0	0	0	0	0	0	0	0	1	0	5	7	5	5	8	6	s	0	submediterranean
Diplotaxis_tenuifolia	0	0	1	0	forb	0	0	0	0	1	50	0	0.333333	0.333333	0.333333	Simple	leaf	basal	1	biotic	adhesive	0	0	0	1	0	0	0	0	0	0	0	0	0	0	1	8	7	5	4	6	5	w	0	submediterranean
Echium_vulgare	0	1	0	0	forb	0	0	0	0	1	80	0.25	0.25	0.25	0.25	Simple	leaf	alternate	2	biotic	adhesive	0	0	0	0	0	0	0	0	0	0	0	0	0	1	1	9	7	5	4	5	4	w	0	wide
Elaeagnus_angustifolia	0	0	1	0	tree	1	0	0	0	0	500	0	1	0	0	Simple	scleromorphic	alternate	3	biotic	ingested	1	0	0	0	0	0	0	0	0	0	0	0	0	1	0	9	7	5	3		2	s	1	neo
Equisetum_ramosissimum	0	0	1	0	forb	0	0	0	1	0	100	0	0	0	0	Simple	scleromorphic	whorled	1	abiotic	wind	0	0	0	0	0	0	0	0	0	0	0	0	0	1	0	7	7	6	3	7	1	s	0	wide
Erigeron_sumatrensis	0.5	0.5	0	0	forb	0	0	0	0	0	150	0	0.333333	0.333333	0.333333	Simple	leaf	alternate	1	biotic	wind	0	1	0	0	0	0	0	0	0	0	0	0	0	0	1	8	8	5	3		7	s	0	neo
Erodium_cicutarium	0.5	0.5	0	0	forb	0	0	0	0	0	20	0.25	0.25	0.25	0.25	palmately	leaf	basal	1	biotic	adhesive	0	0	0	0	0	0	0	0	0	0	0	0	0	1	1	8	7	5	3	5	3	w	0	wide
Eryngium_campestre	0	0	1	1	forb	0	0	0	0	1	40	0	0	0.5	0.5	Simple	scleromorphic	alternate	1	biotic	wind	0	0	0	0	0	0	0	0	0	0	0	0	0	1	0	9	7	5	3	8	3	w	0	submediterranean
Euonymus_europaeus	0	0	1	0	shrub	0	0	1	0	0	500	0.5	0.5	0	0	Simple	leaf	opposite	1	biotic	ingested	1	0	0	0	0	0	0	0	0	0	0	0	0	1	0	6	5	5	5	8	5	s	0	wide
Eupatorium_cannabinum	0	0	1	0	forb	0	0	0	0	0	150	0	0	0.5	0.5	Simple	leaf	alternate	1	biotic	wind	0	1	0	0	0	0	0	0	0	0	0	0	0	0	0	7	7	5	7	5	7	s	0	wide
Euphorbia_cyparissias	0	0	1	0	forb	0	0	1	0	0	40	0.5	0.5	0	0	Simple	leaf	whorled	1	biotic	myrmecochory	0	0	0	0	0	0	0	0	0	0	0	0	0	1	0	7	7	5	3	5	5	w	0	wide
Euphorbia_helioscopia	1	0	0	0	forb	0	0	1	0	0	40	0.333333	0.333333	0.333333	0	Simple	leaf	whorled	1	biotic	ballistic	0	0	0	0	0	0	0	0	0	0	0	0	0	1	0	9	7	5	3	5	6	w	0	wide
Frangula_alnus	0	0	1	0	shrub	0	0	0	0	0	300	0	1	0	0	Simple	leaf	opposite	1	biotic	ingested	1	0	0	0	0	0	0	0	0	0	0	0	0	1	0	6	5	4	7	5	5	s	0	wide
Fraxinus_angustifolia	0	0	1	0	tree	0	0	0	0	1	1500	1	0	0	0	pinnately	leaf	alternate	1	abiotic	wind	0	0	0	0	0	0	0	0	0	0	1	0	0	0	0	4	8	6	7	7	8	s	0	submediterranean
Fraxinus_excelsior	0	0	1	0	tree	0	0	0	0	1	2000	1	0	0	0	pinnately	leaf	alternate	1	abiotic	wind	0	0	0	0	0	0	0	0	0	0	1	0	0	0	0	4	5	4	7	7	7	s	1	wide
Fraxinus_ornus	0	0	1	0	tree	0	0	0	0	1	1000	0.5	0.5	0	0	pinnately	leaf	alternate	1	abiotic	wind	0	0	0	0	0	0	0	0	0	0	1	0	0	0	0	5	8	6	3	8	3	s	0	submediterranean
Galium_aparine	1	0	0	0	vine	0	0	0	0	0	120	0.25	0.25	0.25	0.25	Simple	leaf	whorled	3	biotic	adhesive	0	0	0	0	0	0	0	0	0	0	0	0	0	1	1	6		5	4	5	5	v	0	wide
Galium_mollugo	0	0	1	0	shrub	0	0	0	0	0	100	0	0.5	0.5	0	Simple	leaf	whorled	1	biotic	adhesive	0	0	0	0	0	0	0	0	0	0	0	0	0	1	1	6	5	5	5	5	4	s	0	wide
Genista_tinctoria	0	0	1	0	shrub	1	0	0	0	0	40	0	0.5	0.5	0	Simple	leaf	alternate	1	biotic	ballistic	0	0	0	0	0	0	1	0	0	0	0	0	0	0	0	5	6	5	5	3	3	w	0	wide
Geranium_columbinum	1	0	0	0	forb	0	0	0	0	1	60	0	0.333333	0.333333	0.333333	Simple	leaf	basal	1	biotic	ballistic	0	0	0	0	0	0	0	0	0	0	0	0	0	1	1	7	9	6	2	5	2	s	0	submediterranean
Geranium_dissectum	1	0	0	0	forb	0	0	0	0	1	40	0.333333	0.333333	0.333333	0	Simple	leaf	basal	1	biotic	ballistic	0	0	0	0	0	0	0	0	0	0	0	0	0	1	1	7	8	5	2	5	2	w	0	wide
Geranium_molle	1	0	0	0	forb	0	0	0	0	1	25	0.5	0.5	0	0	Simple	leaf	basal	2	biotic	ballistic	0	0	0	0	0	0	0	0	0	0	0	0	0	1	1	7	6	5	3	5	4	w	0	wide
Geranium_purpureum	0.5	0.5	0	0	forb	0	0	0	0	1	20	0.333333	0.333333	0.333333	0	Simple	leaf	basal	1	biotic	ballistic	0	0	0	0	0	0	0	0	0	0	0	0	0	1	1	7	8	5	3	6	3	w	0	submediterranean
Geranium_robertianum	0.5	0.5	0	0	forb	0	0	0	0	1	40	0	0.5	0.5	0	Simple	leaf	basal	1	biotic	ballistic	0	0	0	0	0	0	0	0	0	0	0	0	0	1	1	4	6	5	4	5	5	w	0	wide
Geum_urbanum	0	0	1	0	forb	0	0	0	1	0	100	0	0.5	0.5	0	palmately	leaf	alternate	1	biotic	adhesive	0	0	1	0	0	0	0	0	0	0	0	0	0	0	1	4	5	5	5	6	7	w	0	wide
Gladiolus_italicus	0	0	1	0	forb	0	0	0	1	0	60	0.5	0.5	0	0	Simple	leaf	basal	1	biotic	wind	0	0	0	0	0	0	0	0	0	0	0	0	0	1	0	9	9	5	3	5	3	s	0	mediterranean
Glechoma_hederacea	0	0	1	0	forb	0	0	0	0	0	30	0.5	0.5	0	0	Simple	leaf	opposite	2	biotic	adhesive	0	0	0	0	1	0	0	0	0	0	0	0	0	0	1	6	7	4	4	5	3	w	0	wide
Hedera_helix	0	0	1	0	vine	0	0	0	0	0	1500	0	0	0	1	Simple	scleromorphic	alternate	1	biotic	ingested	1	0	0	0	0	0	0	0	0	0	0	0	0	1	0	4	5	4	5			i	0	wide
Helianthemum_jonium	0	0	1	0	forb	0	0	0	0	0	30	0.5	0.5	0	0	Simple	scleromorphic	opposite	3	biotic	non-specialized	0	0	0	0	0	0	0	0	0	0	0	0	0	1	0	11	10	4	2	7	1	i	0	mediterranean
Helianthemum_nummularium	0	0	1	0	forb	0	0	0	0	0	30	0	0.5	0.5	0	Simple	scleromorphic	opposite	2	biotic	non-specialized	0	0	0	0	0	0	0	0	0	0	0	0	0	1	0	9		6	4	7	2	i	0	wide
Helminthotheca_echioides	0.5	0.5	0	0	forb	0	0	1	0	1	60	0	0.5	0.5	0	Simple	leaf	basal	2	biotic	wind	0	1	0	0	0	0	0	0	0	0	0	0	0	0	1	11	8	5	2		2	s	0	mediterranean
Hippocrepis_emerus	0	0	1	0	shrub	1	0	0	0	0	200	0.5	0.5	0	0	pinnately	leaf	alternate	1	biotic	non-specialized	0	0	0	0	0	0	1	0	0	0	0	0	0	0	0	7	6	4	3	9	2	i	0	submediterranean
Hordeum_murinum	1	0	0	0	graminoid	0	0	0	0	0	40	0	0.333333	0.333333	0.333333	Simple	leaf	alternate	2	abiotic	wind	0	0	0	0	0	0	0	0	1	0	0	0	0	0	1	8	8	4	5	5	3	s	0	wide
Humulus_lupulus	0	0	1	0	vine	0	0	0	1	0	600	0	0	1	0	Simple	leaf	opposite	1	abiotic	wind	0	0	0	0	0	0	0	0	0	0	0	0	0	1	0	7	6	4	8	6	8	s	0	wide
Hypericum_perforatum	0	0	1	0	forb	0	0	0	1	0	80	0	0.5	0.5	0	Simple	leaf	opposite	1	biotic	adhesive	0	0	0	0	0	0	0	0	0	0	0	0	0	1	1	7	8	6				s	0	wide
Hypochaeris_radicata	0	0	1	0	forb	0	0	1	0	1	50	0.333333	0.333333	0.333333	0	Simple	leaf	basal	2	biotic	wind	0	1	0	0	0	0	0	0	0	0	0	0	0	0	0	9	8	4	2		1	s	1	wide
Inula_salicina	0	0	1	0	forb	0	0	0	0	1	40	0	0.333333	0.333333	0.333333	Simple	leaf	alternate	1	biotic	wind	0	1	0	0	0	0	0	0	0	0	0	0	0	0	0	7	5	5	4	9	2	s	1	wide
Iris_foetidissima	0	0	1	0	forb	0	0	0	1	0	100	0	0.5	0.5	0	Simple	leaf	alternate	1	biotic	ingested	1	0	0	0	0	0	0	0	0	0	0	0	0	1	0	7	7	5	4	4	5	w	1	submediterranean
Jacobaea_erratica	0	1	0	0	forb	0	0	0	0	0	80	0	0.333333	0.333333	0.333333	Simple	leaf	alternate	1	biotic	wind	0	1	0	0	0	0	0	0	0	0	0	0	0	0	0	7	6	4	4	7	4	s	0	wide
Juniperus_communis	0	0	1	1	shrub	0	0	0	0	1	300	1	0	0	0	Simple	needle	whorled	1	abiotic	ingested	1	0	0	0	0	0	0	0	0	0	0	0	0	1	0	8	0	0	4	0	4	i	0	wide
Knautia_integrifolia	1	0	0	0	forb	0	0	0	0	1	60	0.5	0.5	0	0	Simple	leaf	opposite	1	biotic	myrmecochory	0	0	0	0	0	0	0	0	0	0	0	0	0	1	0	7	8	5	3	3	2	s	0	mediterranean
Lamium_purpureum	0.5	0.5	0	0	forb	0	0	0	0	0	20	0.25	0.25	0.25	0.25	Simple	leaf	opposite	1	biotic	myrmecochory	0	0	0	0	1	0	0	0	0	0	0	0	0	0	1	7	7	5	4	5	5	w	0	wide
Lathyrus_sphaericus	1	0	0	0	forb	1	0	0	0	0	50	0	1	0	0	pinnately	leaf	alternate	1	biotic	non-specialized	0	0	0	0	0	0	1	0	0	0	0	0	0	0	1	10	9	5	2	5	2	s	0	mediterranean
Lepidium_campestre	1	0	0	0	forb	0	0	0	0	0	80	0	1	0	0	Simple	leaf	alternate	1	biotic	ballistic	0	0	0	1	0	0	0	0	0	0	0	0	0	0	1	7	7	4	4	5	4	s	0	wide
Ligustrum_vulgare	0	0	1	0	shrub	0	0	0	0	0	300	0.5	0.5	0	0	Simple	scleromorphic	alternate	1	biotic	ingested	1	0	0	0	0	0	0	0	0	0	1	0	0	0	0	7	6	4		8		s	0	wide
Linum_bienne	0	1	0	0	forb	0	0	0	0	0	30	0	0.5	0.5	0	Simple	leaf	alternate	1	biotic	wind	0	0	0	0	0	0	0	0	0	0	0	0	0	1	0	7	7	5	3	7	2	s	0	submediterranean
Lonicera_caprifolium	0	0	1	0	vine	0	0	0	0	0	300	0	0.5	0.5	0	Simple	leaf	opposite	1	biotic	ingested	1	0	0	0	0	0	0	0	0	0	0	0	0	1	0	6	5	6	6		5	s	0	submediterranean
Lonicera_japonica	0	0	1	0	vine	0	0	0	0	0	1000	0.5	0.5	0	0	Simple	leaf	opposite	1	biotic	ingested	1	0	0	0	0	0	0	0	0	0	0	0	0	1	0							s	0	neo
Lotus_corniculatus	0	0	1	0	forb	1	0	0	0	1	40	0.25	0.25	0.25	0.25	pinnately	leaf	alternate	1	biotic	ballistic	0	0	0	0	0	0	1	0	0	0	0	0	0	0	1	7		5	4	7	2	s	0	wide
Luzula_campestris	0	0	1	0	graminoid	0	0	0	0	0	25	0.333333	0.333333	0.333333	0	Simple	scleromorphic	alternate	2	abiotic	myrmecochory	0	0	0	0	0	0	0	0	0	0	0	0	0	1	0	7	4	4	4	3	2	s	0	wide
Lycopus_europaeus	0	0	1	0	forb	0	0	0	1	0	100	0.333333	0.333333	0.333333	0	Simple	leaf	opposite	1	biotic	water	0	0	0	0	1	0	0	0	0	0	0	0	0	0	0	7	6	5	9		7	w	0	wide
Malus_pumila	0	0	1	0	tree	0	0	0	0	0	500	0.5	0.5	0	0	Simple	leaf	alternate	1	biotic	ingested	1	0	1	0	0	0	0	0	0	0	0	0	0	0	0	7	7	5	5	5	5	s	0	wide
Melilotus_indicus	1	0	0	0	forb	1	0	0	0	0	50	0	0.5	0.5	0	pinnately	leaf	alternate	2	biotic	non-specialized	0	0	0	0	0	0	1	0	0	0	0	0	0	0	1	7	7	4	4	5	5	s	1	mediterranean
Mentha_aquatica	0	0	1	0	forb	0	0	0	1	0	30	0	0.333333	0.333333	0.333333	Simple	leaf	opposite	2	biotic	water	0	0	0	0	1	0	0	0	0	0	0	0	0	0	0	7	5	5	9	7	4	s	0	wide
Myosotis_arvensis	0.5	0.5	0	0	forb	0	0	0	0	0	30	0.333333	0.333333	0.333333	0	Simple	leaf	alternate	2	biotic	non-specialized	0	0	0	0	0	0	0	0	0	0	0	0	0	1	1	6	5	5	5		6	w	0	wide
Myosotis_ramosissima	1	0	0	0	forb	0	0	0	0	0	20	0.5	0.5	0	0	Simple	leaf	alternate	2	biotic	non-specialized	0	0	0	0	0	0	0	0	0	0	0	0	0	1	1	9	8	5	2	4	3	w	0	wide
Myosoton_aquaticum	0	0	1	0	forb	0	0	0	1	0	40	0	0.5	0.5	0	Simple	leaf	opposite	1	biotic	non-specialized	0	0	0	0	0	1	0	0	0	0	0	0	0	0	0	7	5	4	8		8	w	0	wide
Neotinea_tridentata	0	0	1	0	forb	0	0	0	1	0	40	0.5	0.5	0	0	Simple	leaf	alternate	1	biotic	wind	0	0	0	0	0	0	0	0	0	1	0	0	0	0	0	8	6	5	3	6	3	w	0	wide
Ochlopoa_annua	0.5	0.5	0	0	graminoid	0	0	0	0	0	10	0.25	0.25	0.25	0.25	Simple	leaf	alternate	1	abiotic	adhesive	0	0	0	0	0	0	0	0	1	0	0	0	0	0	1	7		5	6		8	w	1	wide
Onopordum_acanthium	0	1	0	1	forb	0	0	0	0	1	150	0	0	1	0	Simple	scleromorphic	alternate	3	biotic	wind	0	1	0	0	0	0	0	0	0	0	0	0	0	0	1	11	7	6	4	7	8	s	0	submediterranean
Ornithogalum_orthophyllum	0	0	1	0	forb	0	0	0	1	0	15	0	0.5	0.5	0	Simple	leaf	alternate	1	biotic	myrmecochory	0	0	0	0	0	0	0	0	0	0	0	0	0	1	0	7	5	4	3	6	2	s	0	submediterranean
Oxalis_corniculata	0	0	1	0	forb	0	0	0	1	0	30	0.5	0.5	0	0	palmately	leaf	alternate	1	biotic	myrmecochory	0	0	0	0	0	0	0	0	0	0	0	0	0	1	0	7	7	0	4		6	s	0	mediterranean
Oxalis_dillenii	0.333333	0.333333	0.333333	0	forb	0	0	0	0	1	20	0	0	0.5	0.5	palmately	leaf	alternate	2	biotic	non-specialized	0	0	0	0	0	0	0	0	0	0	0	0	0	1	1	7	7	5	5	5	7	s	0	neo
Phillyrea_angustifolia	0	0	1	0	shrub	0	0	0	0	0	300	0.5	0.5	0	0	Simple	scleromorphic	opposite	3	biotic	ingested	1	0	0	0	0	0	0	0	0	0	1	0	0	0	0	11	10	4	1		2	i	0	mediterranean
Phillyrea_latifolia	0	0	1	0	shrub	0	0	0	0	0	300	0.5	0.5	0	0	Simple	scleromorphic	opposite	1	biotic	ingested	1	0	0	0	0	0	0	0	0	0	1	0	0	0	0	5	8	4	4		5	i	0	mediterranean
Phragmites_australis	0	0	1	0	graminoid	0	0	0	1	0	250	0	0.333333	0.333333	0.333333	Simple	leaf	alternate	1	abiotic	wind	0	0	0	0	0	0	0	0	1	0	0	0	0	0	0	7	5		10	7	5	w	1	wide
Pinus_halepensis	0	0	1	0	tree	0	1	0	0	1	2000	1	0	0	0	Simple	needle	whorled	1	abiotic	wind	0	0	0	0	0	0	0	0	0	0	0	0	1	0	0	11	10	4	2	0	2	i	1	mediterranean
Pinus_nigra	0	0	1	0	tree	0	1	0	0	1	2000	0.5	0.5	0	0	Simple	needle	whorled	1	abiotic	wind	0	0	0	0	0	0	0	0	0	0	0	0	1	0	0	7	7	4	2	9	2	i	1	submediterranean
Pinus_pinaster	0	0	1	0	tree	0	1	0	0	1	2000	0.5	0.5	0	0	Simple	needle	whorled	1	abiotic	wind	0	0	0	0	0	0	0	0	0	0	0	0	1	0	0	10	8	4	2	4	3	i	1	mediterranean
Pinus_pinea	0	0	1	0	tree	0	1	0	0	1	2000	0.5	0.5	0	0	Simple	needle	whorled	1	abiotic	non-specialized	0	0	0	0	0	0	0	0	0	0	0	0	1	0	0	11	8	5	2	4	3	i	0	mediterranean
Pinus_sylvestris	0	0	1	0	tree	0	1	0	0	1	3000	0.5	0.5	0	0	Simple	needle	whorled	1	abiotic	wind	0	0	0	0	0	0	0	0	0	0	0	0	1	0	0	7	0	7	0	0	0	i	0	wide
Plantago_coronopus	0	0	1	0	forb	0	0	0	0	1	30	0.333333	0.333333	0.333333	0	Simple	succulent	basal	1	abiotic	water	0	0	0	0	0	0	0	0	0	0	0	1	0	0	0	8	7	5	7	7	4	s	1	wide
Plantago_lanceolata	0	0	1	0	forb	0	0	0	0	1	50	0	0.5	0.5	0	Simple	leaf	basal	1	abiotic	adhesive	0	0	0	0	0	0	0	0	0	0	0	1	0	0	1	6	7	5				w	0	wide
Plantago_major	0	0	1	0	forb	0	0	0	0	1	30	0.25	0.25	0.25	0.25	Simple	leaf	basal	1	abiotic	adhesive	0	0	0	0	0	0	0	0	0	0	0	1	0	0	1	8			5		7	s	0	wide
Plantago_media	0	0	1	0	forb	0	0	0	0	1	60	0	0.5	0.5	0	Simple	leaf	basal	1	abiotic	adhesive	0	0	0	0	0	0	0	0	0	0	0	1	0	0	1	7		7	4	8	3	w	0	wide
Platanthera_chlorantha	0	0	1	0	forb	0	0	0	1	0	50	0	0.5	0.5	0	Simple	leaf	alternate	1	biotic	wind	0	0	0	0	0	0	0	0	0	1	0	0	0	0	0	6		4	7	7		s	0	wide
Poa_bulbosa	0	0	1	0	graminoid	0	0	0	0	0	30	0.333333	0.333333	0.333333	0	Simple	scleromorphic	alternate	1	abiotic	wind	0	0	0	0	0	0	0	0	1	0	0	0	0	0	0	8	8	7	2	4	1	w	0	wide
Poa_pratensis	0	0	1	0	graminoid	0	0	0	1	0	50	0	0.333333	0.333333	0.333333	Simple	leaf	alternate	1	abiotic	adhesive	0	0	0	0	0	0	0	0	1	0	0	0	0	0	1	6			5			w	0	wide
Polygala_comosa	0	0	1	0	forb	0	0	0	1	0	30	0	0.5	0.5	0	Simple	scleromorphic	alternate	1	biotic	wind	0	0	0	0	0	0	0	0	0	0	0	0	0	1	0	8	6	6	3	8	2	s	0	wide
Populus_alba	0	0	1	0	tree	0	0	0	0	0	3000	1	0	0	0	Simple	leaf	alternate	4	abiotic	wind	0	0	0	0	0	0	0	0	0	0	0	0	0	1	0	5	8	7	5	8	6	s	0	wide
Populus_nigra	0	0	1	0	tree	0	0	0	0	0	2500	1	0	0	0	Simple	leaf	alternate	1	abiotic	wind	0	0	0	0	0	0	0	0	0	0	0	0	0	1	0	5	7	6	8	7	7	s	0	wide
Potentilla_hirta	0	0	1	0	forb	0	0	0	0	0	30	0	0.5	0.5	0	palmately	leaf	basal	4	biotic	wind	0	0	1	0	0	0	0	0	0	0	0	0	0	0	0	11	7	3	3	7	3	s	0	mediterranean
Potentilla_reptans	0	0	1	0	forb	0	0	0	0	0	20	0	0.333333	0.333333	0.333333	palmately	leaf	alternate	1	biotic	myrmecochory	0	0	1	0	0	0	0	0	0	0	0	0	0	0	1	6	6	5	6	7	5	w	0	wide
Prunella_laciniata	0	0	1	0	forb	0	0	0	0	0	25	0.333333	0.333333	0.333333	0	Simple	leaf	opposite	2	biotic	ballistic	0	0	0	0	1	0	0	0	0	0	0	0	0	0	0	8	8	5	3	7	2	w	0	submediterranean
Prunella_vulgaris	0	0	1	0	forb	0	0	0	0	0	20	0.25	0.25	0.25	0.25	Simple	leaf	opposite	2	biotic	ballistic	0	0	0	0	1	0	0	0	0	0	0	0	0	0	0	7	6	4	6	4		w	0	wide
Prunus_avium	0	0	1	0	tree	0	0	0	0	0	1500	0.5	0.5	0	0	Simple	leaf	alternate	1	biotic	ingested	1	0	1	0	0	0	0	0	0	0	0	0	0	0	0	4	5	6	5	7	5	s	0	wide
Prunus_spinosa	0	0	1	1	shrub	0	0	0	0	0	300	1	0	0	0	Simple	leaf	alternate	1	biotic	ingested	1	0	1	0	0	0	0	0	0	0	0	0	0	0	0	7	5	5				s	0	wide
Pteridium_aquilinum	0	0	1	0	fern	0	0	0	1	0	200	0	0	0	0	pinnately	scleromorphic	basal	1	abiotic	wind	0	0	0	0	0	0	0	0	0	0	0	0	0	1	0	6	5	4	6	3	3	s	0	wide
Pyracantha_coccinea	0	0	1	1	shrub	0	0	0	0	0	200	0.5	0.5	0	0	Simple	scleromorphic	alternate	1	biotic	ingested	1	0	1	0	0	0	0	0	0	0	0	0	0	0	0	5	8	4	3	5	3	i	0	mediterranean
Pyrus_communis	0	0	1	1	tree	0	0	0	0	1	500	0.5	0.5	0	0	Simple	scleromorphic	alternate	1	biotic	ingested	1	0	1	0	0	0	0	0	0	0	0	0	0	0	0	7	7	5	5	5	5	s	0	wide
Quercus_ilex	0	0	1	0	tree	0	0	0	0	1	1000	0	1	0	0	Simple	scleromorphic	alternate	2	abiotic	non-specialized	0	0	0	0	0	0	0	0	0	0	0	0	0	1	0	2	9	4	3			i	0	mediterranean
Quercus_robur	0	0	1	0	tree	0	0	0	0	1	2000	0.5	0.5	0	0	Simple	leaf	alternate	2	abiotic	non-specialized	0	0	0	0	0	0	0	0	0	0	0	0	0	1	0	7	6	6	6	5	6	s	0	wide
Ranunculus_bulbosus	0	0	1	0	forb	0	0	0	1	0	50	1	0	0	0	palmately	leaf	alternate	1	biotic	non-specialized	0	0	0	0	0	0	0	0	0	0	0	0	0	1	0	8	6	5	3	7	3	s	0	wide
Ranunculus_parviflorus	1	0	0	0	forb	0	0	0	0	0	20	0	1	0	0	Simple	leaf	alternate	2	biotic	non-specialized	0	0	0	0	0	0	0	0	0	0	0	0	0	1	1	8	7	4	5	6	5	s	0	submediterranean
Ranunculus_polyanthemos	0	0	1	0	forb	0	0	0	0	0	80	0	0.5	0.5	0	Simple	leaf	alternate	1	biotic	non-specialized	0	0	0	0	0	0	0	0	0	0	0	0	0	1	0	6		6	5	6		s	0	wide
Ranunculus_sardous	1	0	0	0	forb	0	0	0	0	0	30	0.25	0.25	0.25	0.25	palmately	leaf	alternate	1	biotic	non-specialized	0	0	0	0	0	0	0	0	0	0	0	0	0	1	1	8	7	5	8		7	s	1	submediterranean
Raphanus_raphanistrum	1	0	0	0	forb	0	0	0	0	1	60	0	0	1	0	Simple	leaf	alternate	1	biotic	non-specialized	0	0	0	1	0	0	0	0	0	0	0	0	0	0	1	11	5	5		4	5	s	0	mediterranean
Reseda_alba	0.333333	0.333333	0.333333	0	forb	0	0	0	0	1	80	0.5	0.5	0	0	pinnately	leaf	alternate	1	biotic	non-specialized	0	0	0	0	0	0	0	0	0	0	0	0	0	1	0	11	8	4	3	7	1	s	0	mediterranean
Rhamnus_alaternus	0	0	1	0	shrub	0	0	0	0	1	500	1	0	0	0	Simple	scleromorphic	alternate	1	biotic	ingested	1	0	0	0	0	0	0	0	0	0	0	0	0	1	0	4	9	5	2	4	4	i	0	mediterranean
Rhamnus_cathartica	0	0	1	1	shrub	0	0	0	0	1	500	0.5	0.5	0	0	Simple	leaf	opposite	1	biotic	ingested	1	0	0	0	0	0	0	0	0	0	0	0	0	1	0	7	5	5	4	8		s	0	wide
Robinia_pseudoacacia	0	0	1	1	tree	1	0	0	0	1	2000	0	1	0	0	pinnately	leaf	alternate	1	biotic	non-specialized	0	0	0	0	0	0	1	0	0	0	0	0	0	0	0	5	7	5	4		8	s	1	neo
Rosa_canina	0	0	1	1	shrub	0	0	0	0	1	200	0	0.5	0.5	0	pinnately	leaf	alternate	1	biotic	ingested	1	0	1	0	0	0	0	0	0	0	0	0	0	0	0	8	5	5	4			s	0	wide
Rubia_peregrina	0	0	1	0	vine	0	0	0	0	1	250	0.5	0.5	0	0	Simple	leaf	whorled	1	biotic	ingested	1	0	0	0	0	0	0	0	0	0	0	0	0	1	1	5	9	4	4	5	3	i	0	mediterranean
Rubus_ulmifolius	0	0	1	1	shrub	1	0	0	0	0	150	0	0.5	0.5	0	palmately	leaf	alternate	1	biotic	ingested	1	0	1	0	0	0	0	0	0	0	0	0	0	0	0	5	8	5	4	5	8	w	0	submediterranean
Ruscus_aculeatus	0	0	1	1	shrub	0	0	0	1	0	100	1	0	0	0	Simple	scleromorphic	alternate	1	abiotic	ingested	1	0	0	0	0	0	0	0	0	0	0	0	0	1	0	4	8	5	4	5	5	i	0	submediterranean
Salvia_verbenaca	0	0	1	0	forb	0	0	0	0	1	50	0.25	0.25	0.25	0.25	Simple	leaf	basal	2	biotic	adhesive	0	0	0	0	1	0	0	0	0	0	0	0	0	0	1	8	8	4	3	5	7	s	0	mediterranean
Sambucus_nigra	0	0	1	0	shrub	0	0	0	0	0	500	0.5	0.5	0	0	pinnately	leaf	opposite	1	biotic	ingested	1	0	0	0	0	0	0	0	0	0	0	0	0	1	0	7	5	4	5		9	s	0	wide
Sanguisorba_minor	0	0	1	0	forb	0	0	0	1	0	50	0	0	1	0	pinnately	scleromorphic	alternate	2	biotic	wind	0	0	1	0	0	0	0	0	0	0	0	0	0	0	0	7	6	5	3	8	2	s	0	wide
Scabiosa_columbaria	0	0	1	0	forb	0	0	0	0	0	40	0.25	0.25	0.25	0.25	pinnately	leaf	opposite	1	biotic	wind	0	0	0	0	0	0	0	0	0	0	0	0	0	1	0	8	5	5	4	8	2	s	0	wide
Scabiosa_triandra	0	0	1	0	forb	0	0	0	0	0	100	0	0.333333	0.333333	0.333333	pinnately	leaf	opposite	1	biotic	wind	0	0	0	0	0	0	0	0	0	0	0	0	0	1	0							s	0	submediterranean
Sedum_sexangulare	0	0	1	0	forb	0	0	0	0	0	10	0	0.5	0.5	0	Simple	succulent	alternate	1	biotic	wind	0	0	0	0	0	0	0	0	0	0	0	0	0	1	0	7	5	4	7	8	1	w	0	wide
Serapias_vomeracea	0	0	1	0	forb	0	0	0	1	0	60	0.5	0.5	0	0	Simple	leaf	alternate	1	biotic	wind	0	0	0	0	0	0	0	0	0	1	0	0	0	0	0	10	8	5	3	4	2	s	0	mediterranean
Sherardia_arvensis	1	0	0	0	forb	0	0	0	0	0	25	0.333333	0.333333	0.333333	0	Simple	leaf	whorled	1	biotic	wind	0	0	0	0	0	0	0	0	0	0	0	0	0	1	1	8	6	5	5	8	5	w	0	mediterranean
Silene_latifolia	0	0.5	0.5	0	forb	0	0	0	0	1	80	0	0.333333	0.333333	0.333333	Simple	leaf	opposite	2	biotic	wind	0	0	0	0	0	1	0	0	0	0	0	0	0	0	1	8			4		7	s	1	wide
Silene_viridiflora	0	0	1	0	forb	0	0	0	0	1	100	0	0.5	0.5	0	Simple	leaf	opposite	1	biotic	wind	0	0	0	0	0	1	0	0	0	0	0	0	0	0	0	5	7	6	4	5	5	s	0	wide
Silene_vulgaris	0	0	1	0	forb	0	0	0	0	1	30	0.333333	0.333333	0.333333	0	Simple	scleromorphic	opposite	1	biotic	wind	0	0	0	0	0	1	0	0	0	0	0	0	0	0	0	8			4	7	2	s	0	wide
Sisymbrium_officinale	1	0	0	0	forb	0	0	0	0	0	80	0	0.5	0.5	0	Simple	leaf	alternate	1	biotic	wind	0	0	0	1	0	0	0	0	0	0	0	0	0	0	1	8	6	5	4		7	s	0	wide
Sonchus_arvensis	0	0	1	1	forb	0	0	1	0	1	150	0	0.333333	0.333333	0.333333	Simple	leaf	alternate	1	biotic	wind	0	1	0	0	0	0	0	0	0	0	0	0	0	0	1	7	5		5	7		s	1	wide
Sonchus_asper	1	0	0	1	forb	0	0	1	0	1	100	0.25	0.25	0.25	0.25	Simple	leaf	alternate	1	biotic	wind	0	1	0	0	0	0	0	0	0	0	0	0	0	0	1	7	5		4	7	7	s	1	wide
Sorbus_domestica	0	0	1	0	tree	0	0	0	0	0	500	0.5	0.5	0	0	pinnately	leaf	alternate	1	biotic	ingested	1	0	1	0	0	0	0	0	0	0	0	0	0	0	0	4	7	5	3	8	3	s	0	submediterranean
Stachys_officinalis	0	0	1	0	forb	0	0	0	1	0	40	0	0.333333	0.333333	0.333333	Simple	leaf	opposite	1	biotic	non-specialized	0	0	0	0	1	0	0	0	0	0	0	0	0	0	0	6	5	4	6	4	3	s	0	wide
Stellaria_media	1	0	0	0	forb	0	0	0	0	0	30	0.25	0.25	0.25	0.25	Simple	leaf	opposite	1	biotic	non-specialized	0	0	0	0	0	1	0	0	0	0	0	0	0	0	1	6			4	7	8	w	0	wide
Stellaria_pallida	1	0	0	0	forb	0	0	0	0	0	20	0.5	0.5	0	0	Simple	leaf	opposite	1	biotic	non-specialized	0	0	0	0	0	1	0	0	0	0	0	0	0	0	1	8	8	5	3	5	4	s	0	wide
Symphytum_bulbosum	0	0	1	0	forb	0	0	0	1	0	50	0	1	0	0	Simple	leaf	opposite	2	biotic	myrmecochory	0	0	0	0	0	0	0	0	0	0	0	0	0	1	0	4	7	6	4	5	3	s	0	wide
Symphytum_officinale	0	0	1	0	forb	0	0	0	1	0	60	0	0.5	0.5	0	Simple	leaf	opposite	2	biotic	myrmecochory	0	0	0	0	0	0	0	0	0	0	0	0	0	1	0	7	6	4	8		8	s	0	wide
Tamarix_gallica	0	0	1	0	tree	0	0	0	0	0	500	0.5	0.5	0	0	Simple	needle	alternate	3	biotic	wind	0	0	0	0	0	0	0	0	0	0	0	0	0	1	0	11	7	4	6	5	3	i	1	mediterranean
Taraxacum_spec	0	0	1	0	forb	0	0	1	0	1	25	0.25	0.25	0.25	0.25	Simple	leaf	basal	1	biotic	wind	0	1	0	0	0	0	0	0	0	0	0	0	0	0	1	7			5		7	s	0	wide
Teucrium_chamaedrys	0	0	1	0	forb	0	0	0	1	0	30	0	0.5	0.5	0	Simple	scleromorphic	opposite	2	biotic	wind	0	0	0	0	1	0	0	0	0	0	0	0	0	0	0	7	6	5	2	8	1	i	0	wide
Teucrium_scordium	0	0	1	0	forb	0	0	0	1	0	60	0	0.5	0.5	0	Simple	scleromorphic	opposite	1	biotic	wind	0	0	0	0	1	0	0	0	0	0	0	0	0	0	0	7	7	5	8	8	2	w	1	wide
Thlaspi_alliaceum	1	0	0	0	forb	0	0	0	0	0	30	0.5	0.5	0	0	Simple	leaf	alternate	1	biotic	wind	0	0	0	1	0	0	0	0	0	0	0	0	0	0	1	6	6	5	4	6	5	s	0	mediterranean
Thymus_pulegioides	0	0	1	0	forb	0	0	0	0	0	30	0.333333	0.333333	0.333333	0	Simple	scleromorphic	opposite	1	biotic	myrmecochory	0	0	0	0	1	0	0	0	0	0	0	0	0	0	0	8		5	4		1	i	0	wide
Torilis_nodosa	1	0	0	0	forb	0	0	0	0	1	60	0.333333	0.333333	0.333333	0	pinnately	leaf	alternate	2	biotic	adhesive	0	0	0	0	0	0	0	0	0	0	0	0	0	1	1	7	8	6	4	7	6	s	0	submediterranean
Trifolium_nigrescens	1	0	0	0	forb	1	0	0	0	0	30	0.5	0.5	0	0	palmately	leaf	basal	2	biotic	non-specialized	0	0	0	0	0	0	1	0	0	0	0	0	0	0	1	8	6	5	5	5	6	s	0	mediterranean
Trifolium_repens	0	0	1	0	forb	1	0	0	0	1	20	0.25	0.25	0.25	0.25	palmately	leaf	basal	2	biotic	non-specialized	0	0	0	0	0	0	1	0	0	0	0	0	0	0	1	8					7	w	1	wide
Tripolium_pannonicum	0	1	0	0	forb	0	0	0	0	1	100	0	0	0.5	0.5	Simple	succulent	alternate	1	biotic	wind	0	1	0	0	0	0	0	0	0	0	0	0	0	0	0	8	7		9	7	7	w	1	wide
Ulmus_laevis	0	0	1	0	tree	0	0	0	0	1	1000	1	0	0	0	Simple	leaf	alternate	1	abiotic	wind	0	0	0	0	0	0	0	0	0	0	0	0	0	1	0	4	6	5	8	7	7	s	0	wide
Valerianella_locusta	1	0	0	0	forb	0	0	0	0	0	30	0.5	0.5	0	0	Simple	leaf	alternate	1	biotic	wind	0	0	0	0	0	0	0	0	0	0	0	0	0	1	0	7	5	5	5	7		w	0	submediterranean
Veronica_arvensis	1	0	0	0	forb	0	0	0	0	0	40	0.5	0.5	0	0	Simple	leaf	alternate	2	biotic	ballistic	0	0	0	0	0	0	0	0	0	0	0	1	0	0	1	5	5	5	5	6		w	0	wide
Veronica_hederifolia	1	0	0	0	forb	0	0	0	0	0	10	0.5	0.5	0	0	Simple	leaf	alternate	2	biotic	myrmecochory	0	0	0	0	0	0	0	0	0	0	0	1	0	0	1	6	6	5	5	3	7	s	0	wide
Veronica_officinalis	0	0	1	0	forb	0	0	0	0	1	50	0	0.5	0.5	0	Simple	leaf	alternate	2	biotic	ballistic	0	0	0	0	0	0	0	0	0	0	0	1	0	0	0	5		5	4	2	3	w	0	wide
Veronica_persica	1	0	0	0	forb	0	0	0	0	0	50	0.25	0.25	0.25	0.25	Simple	leaf	alternate	2	biotic	myrmecochory	0	0	0	0	0	0	0	0	0	0	0	1	0	0	1	8	7	5	5	5	6	w	0	neo
Viburnum_lantana	0	0	1	0	shrub	0	0	0	0	0	400	0.5	0.5	0	0	Simple	leaf	opposite	2	biotic	ingested	1	0	0	0	0	0	0	0	0	0	0	0	0	1	0	7	5	5	4	8	5	w	0	wide
Viburnum_opulus	0	0	1	0	shrub	0	0	0	0	0	300	0	1	0	0	Simple	leaf	opposite	2	biotic	ingested	1	0	0	0	0	0	0	0	0	0	0	0	0	1	0	6	5	5	7	7	6	s	0	wide
Vicia_sativa	1	0	0	0	forb	1	0	0	0	0	80	0.5	0.5	0	0	pinnately	leaf	alternate	1	biotic	non-specialized	0	0	0	0	0	0	1	0	0	0	0	0	0	0	1	5	5	6				w	0	mediterranean
Vicia_villosa	0.5	0.5	0	0	forb	1	0	0	0	0	100	0.5	0.5	0	0	pinnately	leaf	alternate	2	biotic	non-specialized	0	0	0	0	0	0	1	0	0	0	0	0	0	0	1	7	6	5	4	4	5	w	0	submediterranean
Vincetoxicum_hirundinaria	0	0	1	0	forb	0	0	1	1	0	120	0	0.5	0.5	0	Simple	scleromorphic	opposite	1	biotic	wind	0	0	0	0	0	0	0	0	0	0	0	0	0	1	0	6	5	5	3	7	3	s	0	wide
Viola_hirta	0	0	1	0	forb	0	0	0	1	0	15	1	0	0	0	Simple	leaf	basal	2	biotic	myrmecochory	0	0	0	0	0	0	0	0	0	0	0	0	0	1	0	6	5	5	3	8	2	s	0	wide
Viola_odorata	0	0	1	0	forb	0	0	0	1	0	15	1	0	0	0	Simple	leaf	basal	2	biotic	myrmecochory	0	0	0	0	0	0	0	0	0	0	0	0	0	1	0	5	6	5	5		8	w	0	wide
Viola_reichenbachiana	0	0	1	0	forb	0	0	0	1	0	20	0.333333	0.333333	0.333333	0	Simple	leaf	basal	2	biotic	myrmecochory	0	0	0	0	0	0	0	0	0	0	0	0	0	1	0	4	5	4	5	7	6	w	0	wide
